# Supplementary material for: Development and characterization of 57 SNP markers in Misgurnus anguillicaudatus
Source: Research Square preprint supplement (doi:10.21203/rs.3.rs-201840/v1), 2021-02-18
Supplement: Supplementary file 1 [file 521db788d72d02032912affe.docx]

Supplementary material: SNP sequences for *Misgurnus anguillicaudatus*

SNP04

>scaffold5770045

CAGATCGATTTGTTAGGGCTCTTACCATTCCATTTGGAGCCTTCCACTTGATGTTGATATCACTGTTGACATTTGAGGTGGAGCAGGATAGGGAAAGTTTTTCCCCCTGTGTGTGCAGAACTCTTTGAGGTTGACCCAGTGTGATCGGAGGCGGTGCGTCTGGAACTAAAAGCAAAGAAGCACGCCACATTGTATCAAAGCAGCAGGGAATTGTGGGAAAGGAAGAGCAGGCTAAAATGGGGTAACATCAACATGCACAAGTCTGGTGTCTGTACTCTCTTCATATTTGTTAAAGTCTCTCGCTCTCTTTCTCTCACCGAGGCGGACATTGAGTTGATATTGCCC**[G/A]**GATTTAACCGTGGCTCCTTCCAGAGTCCCGACGCAGATGTAGCATCCCGCAAAATCTTTTCTAACGTTGTTCAGGGTCACTCCCATCTCGATGCTGGATGAATATCGCAAACTGTCGGGCAGGGGTTGTCCG

SNP09

>scaffold1370855

AGAATGTGATAGTGCCGTTCACCCTGTTTCGAGTGGATGAACGTTTTTGGAAACGTTATTTTAAGGTAAAAAAACTTCTTTAGTGTTGCTTTAAGGAGAAAAATGAGAATCGATATAAAGTCCTAGACAATTCATACAGACATGTGACCTTAGAATATCTTTCCACATTTTCTGGCCTGAATTTTAAAGAGAGGTTCAGTGTACACTAGTTTGAATGACTGTGCTTTGATATGCGTTCCTTGAATCCACTTGAGAGAAGTCCTTACCGCAGGGGCCACAGACAGGGAAGAGTGCAAAGAAAACACTCACACAAAACTACACTCACACTTACACCCACTTAAACTCTTCAGATCTACAATAACATTTTCTTGCATATAGTACACACCATAATAATAACAAAATGGCCTAAATCATTTATAAACAGGTTCAATGAATACAATTATAAAATGTTCTTGCTCACTGGCATTGCACTTAAAGAAGCATCACCTCTTTGCACAAATCGAGAAATATTACAGCGTGTTGCTTTATACAGCGTGTTTAATTTAACAAAACTATCATTTTTATAAATAACATTAAGAAAATAGCACATCCACAACATAATTATTCATTAGGTATACTTTATTAGTCTAACTTAGCAGTATTCACTTATGTCAGTAAATTTTATTTACATAACTGCCCTATCATCTGAGAATTATAGGATAT**[C/A]**TATGGGAGGAACAGTAGGTTCCCAATTTAAGACATTAAAATATAAAAATCATGCTTTTTTGCAGTTTAATGTCAGATGACCCATTCTGAAGTTCTTTATCTACTCTCATGTAGTACTTCAATGAGTAAAACACACCCTTGGTCTCAGCAGGTTGCTGGGAGAGTAATTTTAGGAGCCTTGAATGTACCGGACTCTAGTTTAAGTAAAGACCTCTCATTACATCGAGTCTTTCAGATGATCCCATTCTGCATTTGGAGACCAGATTTCCATAACAAAGGACCTTGGGGTTTTAGTGGAGCTGTCTTAGCAAAAGACCAAGGAACGTTTTGTGTAAGTTAGTGAGCTGATGAACTCTGTCTCTTTCATTGGAAGCCCAAATAATAAGGCTGTGTCTTTTATAATGATATAATCTAATATGCCATAAATTACCTTACACAGGTGTTCTTATTTGGTTTTACTCTTAAGGTAGGTGAAAAAGCAATGCTGATATTGCTAGTAGCACACATCCAGCTTTACATTATGTTGCAATGTCTTTCTCATTGACTAGTTTTTGTTAATTGACAAAGGAATATAGCAACAATCCTCATCAAAGATTTGCACTTTTTTAATTCAAATGTATTTATAAAGCCCTAATAAAAACAACGACGTAGACCAAAGTGCTGTATGAACAATAGCCCCATAAGAAAAAGACAACTTTTTAACCAAATTACTTCCTCTCATATTTTCAGTCAAGCTCAAATACGTGCACGTAAATGTTTTAGGCTCTATCCACCATCGATGTGACCAAAGCTGAATTGATCCCACACACACACACACACACACACACACACACACAC

SNP10

>scaffold5993856

TCCCAAAAATCCTGACTCACTTGTATGCCGTTGCACAACCACACAGGTTTGTGCTAAACTGGGAGCTTGACTGTAGACCAGCGTGAAATTGAAGCAGTATTTATTCTTGCCGACATCAAAGAGAGAGCAGTTAAATTCAGTCTCGTTCTCCACTTGAGTAAGGAAGTTGAAGGCCAGATGAGTGGAAGCGGGCTTCTCTTTCCCATCTTCCTTATACAGTAGAACTTTTCCATTAGTAACCATACAAGGAGGAGCAATTCGACGGACAGATACGGTTTCAACGCAACCGCTTTTGTAGATGTCATCCACGAGAAGCTTGTAGGAAAAGATGCTTGACAGGTACAACGGACCGGAGGATGTGATGTCTTGTTGAGTATGTGGGGACTTTATGGAAATCTGAATAAATCCATGTTCTGTCAAAGAGGAAGCACACACCATCTCAACATGCTGAGACCTGACCAATTTAATGTTGTGTCTTATTCGGTTTTGCACCTTGTCAATGGTGTTCCTGCCTATCTGGACTTGCTCCAGGTAGCTGACATCAAGGTCGAGAGATGAGGCTTTTCCATTGGGACAAGGGTGGAAGTTGTCATTGGTGTGCACGCCAATCCTAAAGCCATTAGAGCTTCGGTTGTTGTTGGCACGTTCAACAGTCAGGTGAAAGGTTGGCCAGTGCACATGGAGAACCGGGCTCCACCGCCAGATGGCGCTCTGGTTTGACACAGCCTGGTTATATCTATGCTCCAGTCTGAATCTGAAATTACCTGCAAACAGGAAGTAGGAGCAGTCGAACTCCAGTGACCCTTCTGATTGGTCAACAGGAAGTGGTCTGGTGAATACTGTAACATGTTTGTCGATGTCAATCAGCGACAGGGTCAATTTGTAG**[G/C]**CGGTGGAGTTGCCGTCAGCACTGTAATTCACAAACACGCTGGCATTGCTCAAAGCAATGTGCATTGATGGCCAGAGCTGGATATCAGCCATTGCTACAAATATGAAAC

SNP14

>scaffold1510235

TCATTACCGAAACATGAGTTTATAAATGCATATACCGTATATAATGTAATATCATGTTACAGTAATGATATTTTTTGATAATAATAATAAATAAAAAAAATTCTATAATACAAAAAATAATGGTTATAGTAAGTTCAGACCTTAATCTTATATGTGCAAAAATAATTGGCTTCAAGGGCTTTTTAAAAAATCTGATGCTGGACACCTTCTAAGTCTGGATTTCGTGAGAATCACCCATATATGTAAAAAACACTGTTCAGCATGTTTACTAACAACACAAGCATAGGACTCTGACATAATATTAGTTTACATCAATTTAAACCCGTCACTTCTCCTGCTTGCGTTTAAACGAAAGCAGAAGGTCTCTCCCACAGACCACACCCTCAGTAATCGGGACAGAAGTGGTCAAAAGTGAACTAAATAGACGGATTGAAATTCCAGGTGTAAACGTGAATGTCTCTCTCTCGTCCACTTGTGATCCGACATCCCAACTTTGTTACCGCCA**[C/A]**CACAACTACTCCTCTCTGTACCAGCTTCGTCCTCTCTGTTTCAACACCTACTAAACTGCCTACA

SNP15

>scaffold5887746

CAATGCTCTACCACTGAGCTACACAGGAGCATACAGTATATAAAAATGATTAAAATATACAGCAAATGAAATTTTTAAATCAAACAACAAATTGGAATACACAGTAGTCTAATATTACTCTGTCAGCATGCTCAGTTGGGACACCAAAGTACGTGACTACTTAGAAGTAGATCTGTGGTAGTGTGGTTTAATAGTTAAAGATCGGGACAGGAAACCAAACGATTATCAGGTCAAAAGAGATCTTTGATCACCGGCTACATGACTAAAGCAAACAAACACTGCGTAAAAAAACACAAAAAGCATACGGTATCAACATACATCTCTTCTGCACTAGGTCACACATGATTGAATGATATCACAGCACAGTAAATACAATCGAGGTATATCAGAGCATTGTTAAGAATATAAACCCACTTGGAGATGAATCCTCCGCTCTCACATTTCCGTCGTGCATCTGTGTTTTCCGGAAACAGGAGTTCGGGCCGGTGCAGAACATCCACCAATACGGAAAGTTCAGCCTGAACCAG**[C/A]**GGCCGCAACCGATCCTCCAGAGCTGACACAATGTCCTATCAAACACAGACAGTACAGCATAGCACAACAAAGTCAGAGCTTTGGAGTCAACTGCAAATA

SNP23

>scaffold1613029

CACATATGGGCTTTGGGGCTTAATAATAATAATAATAATAACAACAACAACGTCATTACAAATACAGATGGATATCAGCACTTTGTGTTTGACCCCTGGTAATATGGTTATTGACCGGAAAAACATATCAAAGATTGTAATTAAAATAATTAAATAAAAAATATTCAAACATACCTCCATACGG**[G/A]**CCACCACCACTCCTTCCACCTCCACCACCGCCGCCATAGTTTCCTCCCTTCATCGGCCCATAGTTAGAAGAAGACTGGTTGTTGTAGTTGCCGAAGTCATTGTAGTCTCCACCCCCTCCAAAGTTGCCTGCAAAAATCCATTGAAGCATTAAAACTTTCTTATTAAACTGCCAGGGAAGCTTAAAGGGACACTTCACCCATTTGCATTTAGCTTTGTA

SNP29

>scaffold1461345

GATTAGTCAGTTTTAAGATGTTAACATCTACATTCATTGAACATTAAGGCAAAAGTTTAGTGAAAAGATGTAATACGTTAAAACAAATGAACAAGTCCCAACACCTGAATAAAAACTAAATGCAAAACATTATTGACTGTATTGAACATGAGACATTAAAGTATCTGATAATGGGGCGGTTTCCCGGACAGGGTTTAGATTAATCCAGGATTAGGCCTCATTAGAACATTTAAAACGTTTTTGCAAACAAACACCACAGGTGTGATTCTTGAGACAAAACAATGTCACTGATATACATGTTAAAATTAGCCAAGAGCCAGTTGTTTTTAAATGAAAGCAGCTCAAACATGCATTTTAGTCTTGGACTAGGATATATCGTCCTGTCAGGGAAACCACCCCAATATCACTGGCAGCTGCTTTGAGGCACTTTGTGAAAGGATGCATTGGATTGCATCTGGTGTTATAATGTACATCACATTACATACAAATGTAAAGATTAACTGTTTTCTCCATGCACTGCATTACATGAGAAATGAAAGCGACATCAGCGTTC**[A/C]**CCTGGAGTTTCTGTGGCCATCAAGACATGTTTGTGGTATGCACTGAAAACCTAACCTATTTCTCTTCTTCTTTTTGTTTTTTGTTCATCAACTTCAAAAAAAGACTTGCATCTCACCTTCTCATTTTCAACTTGCTGTAAAAATCCCTTTATAAACCACAGAGCAGAACTGAGCGCACAGACGCTGAATAGTAAACCAAAACTATTATCTATTGTATATACAGGTATGTCAATAACCTTTTGTTCCATAGTTTTAAGGAAAATATTACCAAATGACCTTCTAATGAGATATTTTTCACAGCATGTAACTTTAAAGCAGCTATAGTGAACAGTTACAGAGAGATTAAATAAATTTCCATAAATGTATTTCAGTGTTAAGTCTTTGCTTTTGATTGACCAGTGGACGGTTGCATAAACATTAAGACTGTGTCTTAATTTTCAGTTTCAAATCACCAATCTGTCTTTTCATGTAACTGAATGAAAAAGTTCAAGAAAAAAGAGTTAAGACTAGTTTTAACAGTTTATGCAACCAGCCACGTGTATATGTAAGGCAACATGCACTATGGCTTTAATAATGCACTTGAGGTAAATTTGTATGCATTAATCTTAAATGCACTTTGGTTCTAAAGGAAACCTAGCAGAATTAAGAGGCACAAGGACAGAATCTATTCACACATGAAAAACTGAGATTGTACTTCCTTAAAACCATTACAGATCAGAGAGGCTCTTAAGTCAACTAACCTACAAAATGATTATATAAAT

SNP30

>scaffold6030682

ACACGGCTTTAAGTGTAAAATACCGAACTTGTCCTTTAACTAATATTAACCAATACAACATTATTGTACAGTTACCTCTTTGAGCACTGCAGTGTTTCAAGTTACCTTTCATTAATCTGCCCTTCTCTTTTACAGTGAAGCAGAATACGAACCAGGTGCCAGAAAGTACACAAAAGAGTGAGCACACTGACTTATAAAGTCATGACTAATAAAGATCCCTGGGACAATAAAAGCCAAATATACTGGTGTCACTACTAAATATTATGGAAGAAATCTTAATGGTGTATTCCATGGACACCTAACCAATCCTTTTCCCTGTTATCCTTCAGAAAATGATATTGATCTGAAGCAGTTAGACAAACTGCCACTAAAGCCTTTAGCTCCACCCACTACTGAAAAACCAACTTATCAGGAGACTACTCAGATACCACGTTATTTTAATGGTACAGTATGCTTTAATATTACTTAGTGATTTGTACGTTTATTTTAAATTGAAGACAACATTTTTCACTCCACTGTACTGTAGCTCGGTTGGTAAAGCACTGCGTTAAGAGATGTGTACCTTGAATGCATTGTTGGTCACTGTATAGTCGGTCACTGTAGGTCAAATGTAATATTGAGTACCCTTTGAAATACATTGATATTCTTTTGGTGTTTAATTTGTCTTTGAATTTTAGGAAGTCGTTTTGACACAGGTGATAACTCCTCTGTGTTCAGCCCTGTTCCTGTTTCTAAAACAGATGCAATGGGAAAAGAACGTTTCATAGGTAAAGAAGCGCAGCAGCACTTTTTCCACCTATTTCTCACAAAACCTGAACTGACATGTTTGGATTTTTTTTTCCTAATGCAAAGTGTTTTAGGAAAATCGTTTGTGGTTGGGTAAGCAATAGAGAGAGTCCATGATCGTTGGACCTCTGATTGCCTGTATTGTGTTTTCAGCTCCTCATGTGGTCTATAAAACTGACAAACGTCCAGAGGAGCCCTGCTCAGTCACCAATTCTCTCAGTTACTTTCC**[C/T]**GAAGAGGAGGTGGGGTACATCAATGTCACTGGTCCACCCAAGACCCCTCCCTCTAACCTTACTGTGGTGACAGTGGAGGGATGCCCATCCTTCGTCATCCTTGACTGGGAAAAAACTGACAATGAGACCACAGGTACTGCAGATGTTATTGCAATGTGACAGCTGTACAGTATAAAATAGAAATCCCTCTTTCACCTAAAACAGCAAACTTAGAACACACAGACCAATTACTTTTGGTCTGTTTTGGCATGTGAAAGTCCAGCTGAATGTATTTTTTTTGTGATGAAATCATAAAAAAACTTTTTGAGTAAGGTCATGTCAAATATTAAAGTGAAAGGTTGAAATCTAATTTCATCTGTCAAAGATGGCCAAAGAGCAATTTTTTATTATAATTGATTACAGATTCAAAAGACTTTGTGTTGTCTCTATAGAATATAAGGTGGTTATAACCGCCACCGAGGGTCCAAATGAAAAGGAGAAGTCTATTGTGACAACAAATCAAACATTTACAGCAGTGGAGAATCTGGTACCAGAAAGAAGGTATGAACACAAAAACACACAAATATGTCTACATGACAGTGGGGATCTTTCAAGAATTAGTTTAAATTATACTATTTAGTTAATTGTTTTATCACTTTATGAAGCTGTTTTTATTAGGCACCCTCCATAATGTTGGTTCTACAGGTTTTATACTGTAGAGTGGACTGTCAGTTTTATTTACTTGATTTTTATGTATGTTTTAATATATAGCAACTTCAGGTTAATTTAAAGTATTTTATCTAATTGTGTGTTCCTTGGGTTTCAAACTAGTGGTCCAGTGCTATGGGGTTTTTAATGGCCAGTGCCAATTCCGATATTGAGAAAGCAATGTGGTCGATTGGCCAATATGAGGCTGAAATAACATGTAAATGACAGTAAATGAGTGACAAACAGAGAATTGGTCAAACTAAATAAAGAATTATTCTGCATTATGTTTATGAATACACCCTTTTAAAGGGATACTCCATCATTTTGTCATATTAAACTATGT

SNP37

>scaffold5682153

AGTGCCATGTTCTTCCGGTTTGGTTTGAATCTTTCACCTTGTAGTTACCTGGTTAGTTTTTAACACTGCATACCTGCGAGAGGATCGGTGTAGCTCACTCCTCTCTCTTTGTCTTTTCTCTCGACGTCTGTCACTCTCTCCTTCCCTTGCTGAGCTTTCCCGATACCTCTCTCTCCTGTAATGAGTGTGATCTCT**[G/T]**TGTCGAGACGGGCGCTCCTCTTCACTGCACATGTAAGTAATGAAGGAAAATAATGCACATTGTCAAACATGATGTGTTCACTTTCGGGTGATTAATAATCTGATTGTCATACGCTGCCTTATCAAATGATAAAGTGTCAAGCATGCATTATTCAGAATTACTGTGTATTGAAGTGCACAGATTGCATATTAATACTCTATGTAGAGCCTTAAA

SNP42

>scaffold5707545

TTAATAAATGTCCATATTAAATACAAGTATCTATCAGCACAAGGCGCAATCACATTCACAAGTGAAAACAGTCATGGGCAGGTTTTTTGTCTTTTTCCTCCACAATCAACACATCACCCATCAAGCCCAAATGAAAAGAAAATGAGCGGTTGTGTTAGGCATGAAATGATACCTTTGTGAAGACATTTCTTTCCTAATCTTAGCGTACATTGTTGTGGTAATTTCTATAATTGTAGCACAACGACTAGAAAAATATGTCTAACAGCACATACATACCACTGTTTCCAAGATAAGTGTAGGACATAATTAGGATCTGTCCACAATGGCAAGAAGAACAAGTGACATGACATCTAAAG**[G/A]**AGTTACAGTATTTATCGATACACACACTCTATCCATTTGTCTTTTATTACAAAAAAGCTGTTCTGTTCCT

SNP48

>scaffold1460099

TCGATGCGTTCCTCGACATCCTGAAGGTCCTGATGCTCGTTGGGAATCTGAAAGGTGAGCATGAAATGAGCGCCGACCATCTCGTCCTTCTCCGCTCTCCTCTTCCCGAGCTTCCACTGTTTGTCGTCCGCACACATGAGGAAGTGCTCGAAACCTTCGTACTGAGACAGGACGGGGTGGCTGGTCATGTGGTCCATCCATAGGATAAGCCTCCTTTTTCTCTTCTCAATGAAATCTTCCTCGAACCGACCCGTGGCCTGTTTCTCCGGGAGATGGGGCACGGAGATCACCGTGAATTTGTGCAGTAGTCTGTTGTAAAGCCAGTCAAAGTGCTTGTATCGCCGATATACCGGCCTGGTAGTATGACTGGGAGTCACGCGGTATGAGATGTAAGTCTTAATGCCCTTAAACTTCGTCTGTTTCGTGGGGTCTTCAATGGAACAAGAGAAAGGCTGAGGGCTCTCCTTCCATTGCGGCCCCCGTGGACCCATCTCTATAGTGTAAGACTCTGCAATCTTGGCCATCATTGGGACATCACCAAGTATGAAGGCCTCCACACCCGACCGCAC**[G/A]**AAGCTGGAGAATCGGTTCAGGTTTCTCCCCACCATGCTGCCCTTTCTATTACTGGACATGCTGTCCTGACGTTCCATGTGCGGCTTTGACCTGTAGTGGACGTTCGGGTTGGAATACCCCCTTTGGTGGGAATGCCCATTGGCGCCCACTCCTCTCCGAGGATCTTCATCGTCAACCACGGTCGAGCTGTCATCCCAGTCATCCCAATCGTCGTCATCGTCGCTCGGCAGGGTCGTGGACTGCGAGTGGATGTACGACTGATCTTTGCCGGGCGAACTTCCGGGCGAGCTTAAGGAATGGTCAGTTAGGTTGGATCCGGAGCGACTCCGGATGATGTCCACATAGGAGGCAGGGAACAGTCCACGCTCCCCTTTGCTGTTTTCTCCTTGTAACCAGCCGTCCACCGAGTTCTCGTCGAAGATCACCAGCTCTTCGTTCTCCTGTATGCTGATCTCTTCCTTGTTTTCGCTTTGGAAAGTGTAGAGGGCTTTGGCTCGCACGGACATTTTTGTAACTTTACCAAGCCTGATACACAAAAATTTACAAAGTTAACAGATAAACAACAGGGCTGTTATAAGCCTCATTGATAATTGGATCTTATGTCAGCTGTG

SNP50

>scaffold770441

GGTGCCAGCAAAATGAATTTCTTTGGACGAGAAGAATGAAAGAAAGCGAGAATGCGAAAGAGAACAGTATGTGGGAGTATAATGGGGTTTTAATACTGTGACTAAAGCTGCATTCTAAATGTGTCAAGGTCTTGATCAGAGCCTGTAATTATATGCCGATATCAGATGAATTGTTTGGGAAGGTCTTAATTTTGCTAGCAGAAAAGCACTGCACATTTCCATTATATTAGTTATGCTTTTGTGTGACAACAGTGAACTGAAAATCGGTTTCAGGAACAAGTGTCCGAGCAAAATGCTGTTTCATTGTGGTGGCATGAGGAGAGGGTAATTGCCTGAGGTTATTAACCTCATTCTTTTTCTCTCCGTTTTCTCTTTTCTCTCTTAGGATTCTTCCCCCCACGAGTGACAGCTTCCTACTAAAAAACCTTGTCTCTGGAACGGACTACAATTTGTGCGTGCTAGCCATTTTTGATGACACAGTCACTTCCATGGCTGCCACAAAGGTCCTTGGTTGCACGCAGTTTAGTACCAAGGACAATTACCCTGACTGTCGTTCCCTACAAGCCCACTTCCTGGGCGGGACTCTTACCATTCTGGTTGGCGGAGTTGTTGTGGTAACGCTGCTGGTGTTTACTGTGGCGCTGATGGTGCGTCACCGTGTGTGCAGTAACCATGACGACCATCGCGAGATAGGAGAAGAGGTGGGATGCTCAGGAATAGACTCCCCGCCTCTTTCTGGAAAGGGAGCTGACGTGTTCTCTCAGAACAATGGCAGTGGGAATGTTATGATGGTGGTGCTTCCCAACGGGCTCGTTCAGAAACAAAACGT**[C/T]**GCGGAGGGAGGGTTGGGGTCACCGCCCAAACCTACGTCCAGAGTGAAACCAAAAACCCTCCCAAAGCCCAAAGTGAATCTGGAGGAGTTCAGGGCAGGACTGGAGGTGGAGATGGCTTCTTTGAGACCGCTCCCACCGTATACGCCGGATAAAGAGCAAATGTCTTTGTATTACACCCCCGGTAATCATTCGCCCTCCACACTGCCACGTCCGCCACGTCAATTAGGAGCGCAACAACTGAAACTCCGCACAACTAATAAAGACACAGGCAAACGTGCCACTGTGAGTTTGGCACCGCCTCCTACATACAGCACAAATCTGGGTAATAGGCGGTTCAGCACAGGAGGGGGCATCGTGGTCCGTCGAGGAGGCACGGAGAACCAATGGAATTCGTCTCTGGCGTATCAGAGCCCTATTTTGTCCCACGAGAGCCCCCCGCATAGTGCGCTGCGTTACAAGAGAAGTTCATCGTTCGATATGGGTGAAATCGCGACAACGGCCTGCTACAGCTACGCCAAGAGACTCAGTGTAATCTGGACCAAACGGAGCCAGTCGCTACATGGCATGCTGGTCCAGTGCAGCTCAGCAACAAGCACCTCAACAACCAGCAGCGGCGACTTCCAAGCACGAAATGCGCGAGGATACATCCGTGCCTACAACACCACCA

SNP60

>scaffold5879206

TTTAATGATTATCAAACTTACAAATCTGGAAGTGTGCATCAAGAATGAAATAAATCTGGAATTTCTCTACTCCGTATTATAAAAGGTCAGTCGAAAAACGATTCAAGTGCTTTATGTAATTGTGCCGTCATGTAATACACTCTTGACTTCAACTCAATTTCACATTGTATAATTTCCTTTAACAATTCTGGTACAGCACACAAGGGAGAAAATGTGCCAATCTATTAAAGGTCCTGTGGGCAAATTTACTAAATCACATGAAATCTTTGTGCAGGTGTAACCTTGACAATGTGTCCTTGGACATCTCACTTTTCTATGTACATCAATCTCTCGTTTTCTGCTGAGCAAGCTGGCTTTAACCTGCAGTATTTCTCCTTAACTGAACCTAGAATATATATTTCCTTTTTTTAAACAAGGCCTGTACAGGACACACAATT**[C/A]**CAATGGGACCGGTACTCCAAATGCATCTCATATAATATTATCAAACTATTTAAAATAGCATTATTGGGTTCCTGAAAGGTGCTATATAAATAAAAGCATTATTAAATGTAAAACTAGTATTTTCCATCTCAGCAGCTTAAAAAAAGGGAGGGGGGTCACAATTCAGTCCGATGT

SNP65

>scaffold1077693

GCTAGATGGGAGTAGATCCTACACAGTGGGGCTTTAATGTTAATGATTAAAATGGACACACATACAATAAGAATTGCCTTAAATTGATGAAGGTAACACTTTTTCACATTCCCTGTTTGCAGTAGGGCTGCTCGATTATGGGGAAAACGGGATAACACGATAACTTAATGACTCTAAAAACATGCATTTATACACACACACATACACTTTACTCAATTCAATGCATTGTTTAGTAGTGTTCCAGAAGGCTACGCGTGTCAAAGCAGTGCCTTCAGAAGTGCCTTAAACACATTAGTCCAGCGAAACGTGATCCATATTTTAAACACGATCGCTTAAAATGCATATAACAATGCATTACAAACATTCACATGATTAGTGATCTGACTTCGTACAGCATGAGCGCGCAGCTGCACGAGCGAGCGAAAGTGAGACAGAGAGCGGCACCACGATGCAGATGATTTTATTTTCAACGCAAGGGATAGTTTGCCTCAGCTCCCTTGAAACGCATAAAACTGAACAAATACATGATTTGTGTTCGGACTTCGGACAGATGCATGAGCGCGTGCACGCGAGGGAGACGTGGATGAGAGAGTGCATGAGTCG**[C/T]**GGAGAGCCGCTTCGCCATGGTTTTAGTGTTTTGGAGGGGGTTTGTCGCCCGGATTTGCTGTGTTTCCCCCAGACATACGTTCTTCTCCCACACAAAAACAAAATTTTATTCAAAATATGTAAAATTCCGCAAAATTCTGCGTTAACACTGGATTCCGTGTTAATTTGCCGATTGCGTCCGCGATTCCATGATCGCGAAAATTATAGGGCCATATAAATGGACATGTAAAATCCTCTCTGGGTAATTTTTGCACGTATAAAGCCACATACCTTCTATGTAAAACAATTTAACAGATTATTTCAATGCATTTTTTGGCACCTTTAATCGAATTTTTGCTTTTTGGTAAACCAAACTTTTTAAATAAGCCCTGCACACGGTTTAAGGGGTTATCTGTTGCTTCACATTGCTTCCACATCCTTCTTTCCCAACTTTCCAAAGCAAGCTTCCAGCTCTGAGATTGTGGATTTTTTCTATAGCAGAACAATCACGATTGTATTTAAGTTCTGTGAATCACTCCTTGCCAAAATCTAAATGCTTCCTGTCTCTCGCTGGTCTCACAGGAAGCTGTCCGGAGGGTTGGGCCAGCTGACAGATGGCGTGATTGGCCAGGATGATTTTATACAGAAGAGGCCGTACAGGCTATGGCCCGGGTACGATTATGTGGGTTGGAGGAATGACAGTTTGGGACCTGGATATGTGGAGATGGAGTTTGAGTTCGACAGACAAAGGAACTTTACCTCTATGAAGGTGAGCGTAAACAATGCTGTGATGTACTTTAAAGTTCTGCCGTCTTACATTTTTTTGTGCTCATTCTGGGACATGTTTCACATTAAATTACATTTGAGTAAGATTGTTTGCAATAAAAAAAAAATTAAAATTTAAGATAAGATTCAAGATATTAATTTGTCACATACACGGTTATACACATACACAACCTTTAGTAAAAATGTAAATCTGGTATACTTCATAGACCAAAAAATTTAGAAAATATATATAATATAAATACACTAATGCATTAAGGCATTTACAAAAAAATGAAATTAAGAGAGCAGAGATTTGGGGAAAAAATGACATGTTTAATCATTTCAAAACACTGGAATGAAATACTGAAATACGTTTTGATGATGTCACCTTAAACCATAAATAATGTGTACAATAGAATCGATTACAGCTAATGTATGTGTATTTTGTTATAAACTCATATATTTCATTTATTTCATGCGCTTCTTAATATCCCTACTAAAAAGAGGAGGTTGGAATCTTAAGGGGGTTGCACACCGGACGCGCAACTTAGCGGCGCGTCAAGTTGCGTCTAGGACAACTCGGAGGTATCGTACACCGGAAGTGCACATTAACTCATTCACCGCCATTGACGAGTTATCTCGTCAATTGTGAGTTAATATTTAACTAATAAATATGCCTTTCTGGATGAATTTCAAAGTGAAA

SNP 71

>scaffold1681615

ATCAATAAAAGATCATTGCTATTGGCGTACTGCACAGAACTTTTAGACTGCGAGTTGTTTCTAACCTTCAGAAGAAATAGCACCATCTCAAAGATAAAGCAAAACTATGCTGATATAAAGGAAAGCTTTATACTGTATAGCATTTTCATCCCCTGATCCCAGCACAATAGGAGCCTTTAGCCACTTAATGCCAATCTATTCTTGCAGAGTTTCCCTTAGGAAAACCTAAGAACCATTAGGAAGTGGAAAAAAGCCAAATAATACAAAGTATCATAAAGACACTGGAGGTGCTTGCAAAA**[C/G]**CTTAACATACTCTCCTGTACTATTTCTCACAAGTCAATGTTCTCATTGTAATTCAACCCTGAGGGTGGGAACTGGACATTCAGCTATAGGGGAAACCAGGGCTAGTTATCACAGCTTTAACTCCAGGGAGTATATATTTCACTGGTTTCAATCTCATATTTGTATATGCACATATGGTACATTTTTGTAGTTATTGCCTGGGAAAGTGCTCCCATCGAGCATTTGTGACAACATGCTCCAAGCACGGCATGTACGGGTAAGTACTCACAATGGTAACCTGTTATTTTGTATTTTTACAAA

SNP72

>scaffold6028538 CCTCACTACAGTCTAAAACAGCACAATTCCTCTCCAACCTGGCCACAGAGCACACACTCGCGAACATAGATATTTATATGAATAAGGTGTGTATTCATATGTTTGTGATGGGCTGCATTATGTCGCACTCTCGAAAAAATTAAAAGCACTTCCTTTGTGCTACGGCCAGACTAAATGGCGCATTATGTGTCCCTCTCCCCTCTATTTCTCTTTCTCCCATTTCAGAATGATGATGCTCGTACTTATTCACCCCTTTGAGCCAAAGGGAACGTACTCCTATCGCATCATGGAAAAACACA**[G/A]**ACGCGCACTCCTGTATCCCTGTAATGCATTATACATTGTGCTGTAGCTGATTCCCGCACCGCCACCCCCCCACACCCCCACTTCCACACGCCCAGTCTGTTCCAGGCTATCAGACATGACAGTGCCAGCTGGGCTTCTGGCAGCAGCCGAGCAGGGAGGAGGAGAAAAGAGAGGGAATCCAAGAGAGAAGGAGAGATGGAGACACAGCAGGACAATGTGAAGCTGGGATTGGGGGGTATGGGGTGTACAGTTTGCTGCACTACAGCGTCTGTTCCGTTCCCCGCTGATCTAAGGCGTGTT

SNP73

>scaffold391025 TTGACTTTCTTCTAATGGCACGGGAAGTGAAGATTGTCTATGCGCGATAGTGGTAAGTGTGTGTGTGGGCAGAGGGTGAGAAGGTCATTGTTAAGCAGGTGATTTACAAGACCACTGGCCACCTAGTCTTTACCCACAGCGAGGGACGGATCTGCAAAAGTTGGGCTGCTTCCTTCCATTATGCGGCTTAGACCGAGAGACCTGGGAAGCGCTGTATTACTTCAACCCAGCGTGTCTTAACATGGACTGCACAGATCAAAAGAGC**[G/A]**ACTATTCCTCCAAATCTCTCTGCAAGGCTTTTAGACTTCTCTAAAAACATTCAGACAGCGCTAGAAAGTCCAGCTACAGCAACCAAGCTGCACTCCATCAGGAACGCCGGCTGAATTTTAAACAACGTTCTCTGAGATGAAACGATGGGTGAAGTAGATGCTATGTT

SNP74

>scaffold1213125

CTGTCTTGACACTGAAGTATGTGAACTGTACATGAATACAATGCCGTTATACATTAGATGTGTTGCTAATTAAATAGACGTCCGTCCTGACAGTCATGTAGATGATGTTTTGTGTTTGTGACTGCAGCGTTGCTTGGATGGCGTTCACCTGCTGCATGTCTTCTGGGGTTTCTACACTCAACAACTACACCAAGAAGTTTCTGATGGTTGGACCAAAACATAAAAGTGTTTTTTACCCCTGCAAAAACTTCACTTACCCTCC**[C/T]**CAATCTCCTCTTCTCTCTCCTCTCTCTCCATATGTCTCTGCTCCTCTGCCACCTCCTCCAACTTGTCCCGCCCCTCTCTCGCCCTCTCTGTCTCTCCTCCAGCGGGCGTCTTGTCCCCCTACACCCCTCCTTCTGTCTCCTCTGAGTTTCACATC

SNP75

>scaffold6002886

AGGCAACTGTTTGTCTTCATTTTCCCTTGGGCAGCAGAGTAAAAGTGCCATGTTGAATCATGGCCCTGGGATTCATTTTAAATGATGGCTTTTGGGTAAACCTTAGTACTGTAGGTTTCATTGAAACACCTAATGCGCAAAGGCTTCAATGCTGATAATATGCAAAGCAGACATCCATTTAGAAATATACATGCTGTGATACAGTGCAGATATTTGAGGTGTCATTCTGTTTATTGATTTTAGAAGCCCTGCACTTGTCCACTTTTATCGCTTTGGTGATAAATCTTCAAAACTTCAAC**[A/G]**TCACCTCCATGACTCATATTTCTCTGTAGTGCTCGATACAAATAAAACAATACTGCATGGTAGAATTCACTCTCTTCACACTATCCACACCTTTGGTTGTCTTTCATCCTTAATGAAGCTCGGTTTAAAAAAGTCCAGTTGAACTATTTATTTACTTTTCTTCACTGACATTAATACTTTTTCTTTCTGCTCCGCCTGTAGACTCTTCTTCGAGATGGAAGGAGAGAGAGTACGGTCAGCATCCTCTACATTTCAGCCTCCAACATCGAGTCTGGTCAGAAGATCATCTGCCGGGCCTCC

SNP76

>scaffold882275

AAAAATTCTGGAAATCTCTCATTAGTAATATCTTACTAGTTTTCTTTGAAATTCCAAGGTATGACTTCATATCCTGGAGTACAAACTATCAAAAGTACATGAAAGCTTTTTTCATAGTTTGTCAATGCAGTTTAAAAGCTGTTTGGCATGGTTTTTGGGGTGATATGCTCCCAGCTTTTGATTTATTAGTGCTGTCACAGCAAACATTTTAACGTACCCCAGGAAAAT**[T/G]**GCCACCGTCACTCCAAACTCCATTCCCTTGCACTCCATGCACCCCTGCCTAAACCCTTGTTTCATTTCAAAGGAAGATGGATTAGGGCGTAGGGAACGTGGTGGAGAAAATCCAAAAACCAAGTAGGACTGTTGGGCCAGAATACATGCAGGTCTTTAGCAAACGTCTGGTCTGCCTACAGAACAATGGTGCTTGTCTTTGGGTGACACTAGCCCGCTGTGTGCAGAGTGCTCATCACCTCCTGACCTCACAACGCAGAGCCTGTGACAGGCAGCGAGATGTGCTGAAGATGTTTCTTGT

SNP77

>scaffold1000969 AGAGAGAGAGAGAGGAGATAGAGGCAGCATGCATGTTAACACACTGGAGTTATGTAATTGCCATGCAGGCTGTGGTGTATTGCTCTATTTGGCCCCCAGTGTCTTAGAAGAGAGAGAGAGAGAGAGAGAGAGAGACAGAGAGAAAGCCAAGACATCCAGTCATAATAACGCATACATTGAGGCCCTTTCTATGGACACTCAATAAAGCCGGATGACCCATAACCCCCCCAAACATGAGAACAATAATGAGGCGGGGGACAAAAGCC**[G/T]**CACTGCATCTCCCTCAGACAGACGCGACGATCTCAACACTGACAATACGGCTCTGTCATCCACAATCCACATCCCAGACATCAGATTTTTAAAACGAAGCCCCGTGGAACCACAGGAACGGTCCTCTCAATCCGAGCAAGAGGGAGCTTTCGCCGAGACGTAACACTGTCACAGGATAAGCTCGGCAAACAAAGACATTCCCATACTGCCGTGATGGGGGTCGCAGTTACTATGGGGATGCACTTGACCGTAGACACACGAGACGAACACCGTCTGGCTCGCAAGCTAATTTTTACACCG

SNP78

>scaffold5948296

ATATTAAAAATGTAAAATCACTGTGTAGGACAACTGTGTGAATACACCGAACTCTGGGCAGGAGGACACAGATGGAGATGGCATTGGCGATCAGTGTGATGACGATGCAGATGGAGATGGAATTAAGAACGTTGAGGTTTTTGTTGAAAAGAGTTATTAAACAACAAAATATTTGATTGATCATGATTGAGCATATTTACTGTTTATTAGAAACATAAAGTCCATAGGACAGATTCTAATCAATGGCTAATATGATATATTCAGGACAACTGTCGTCTGGTGCCTAATAAAGACCAGCA**[A/G]**AACTCGGACACAGACTCCTATGGTGATGCTTGTGATAACTGTCCCAGTGTTCCCAACGGAGATCAGCTTGATAGTGACGGGAACGGCAAAGGAGACATCTGTGACAATGACATTGATGGAGATGGTGCAGTAACCCCATCTTTACGTCTGTGTGTGCATTACATAGTGTTTTCCATTTCCTTTAGTGTACTGTACTATATTTCTTCATAGGAATTCCTAATGTGTTGGATAACTGTCCAAAGATGCCCAACCCCATGCAGACAGACCGAGATGGAGATGGTGTGGGTGATGCATGTGACA

SNP79

>scaffold1252365

TACCTGAAATACCTCAAGACCAAACTGGTTTTTGTCTCTAAAGAGTAAGTTTGCATGTTTATTTGTGCATGTATGCGTAATTATGTCTGTGGTGTTGTTTTTCCCTATGATGCATGTGAAGTTTTTACTTATCCACCTAGAATCTGTTAGTAGTTAGAAAAAAAACAAAGATTACTCAAACACTGCAATTTAAAATAAGTTATTAAGTAATTAAATGATGCATACAAAAACAAAAAGGATATCGATGTTACAGCACTCGGCAGCAGGTGTGTTTTATTATGATGACAAGTCACAGAAAA**[C/T]**GTAGACGAGAGCTCCCCCTATAGGTCTCAGAGTTTCCTTTATAGCCCTGGTGCCTTTTTCCACCAATCACAGATGAGTTTACAAAATGCCCAATTTTGCAAAAGTGGAAGGACGGGAGAATAAAGTGAATAGGACAAAACACAGCAGCAGTAAAAAAATTTTTACTGCTTGGAATAGATCATTGTGCAAAGTACAGAGCCAATAGGTGC

SNP80

>scaffold412671 ATATTTTAAGATCTGTCCATTCAAGTTATTTTCAGTTGAGACACCTCAAAACATGTGTTTTAGTCTAGGACAAGCCTTAAGCTTTGTCTGTAAAAGGTTGTATGTAAGGGTTTATCTCTAGGTCCATCCAAACTCATCTAAATCCCACTGTACGACTAAACAGAGAGACAGGAACCTTACGTGCACACACATAGAGTGGTGGAAGGATATGACATCAGCAACCACAGACAATCAAAGGTGTAAAGGTGCTTCCTTTCCTAAACTGTTCCAGTGTGCACAAAATGGGAACCAAAACTCCT**[G/T]**CGCTTCCTTCTCCAGACCAAAAAGAAGAGATGAATTGAGCGAAAAAGAGTTGAGGTATTTGTGCCACCACAGCTGACTGTAAACAAGGGCCCATCCACTGATGCAAGCACTGACAGAAAGGCTTTGCGGTTTTCATTTACAGGCTTGGGGATGACCAGAACTGTACTAACAACTGTCCCATACGGCAAAAAAAAGATATTTGCTAAAATATATTTTGGAATATGTTTGAAAAAAAAAATTCACCAATGTATTTTTTGTATATTTTAAAATATATTTTAAAAATAAATACATTTTGAAGCA

SNP81

>scaffold6031008 TCTGCGTGCTGGCCGGCTAGAAATCGTCTCTCTGTGGGGTTGACCTCCATGTTTGAGTCATCTTCAAAGCCAGAGAGAGAGGTTAGTTCTGTTAGACGAGATGCCGAAACCAGCAGGACAGATAAAGCACCGCTTTCTCCTTTAGAGGCAAGGTTTTCAAAGCCACAGGTGGAGACAGAAGAGGTGGAGGACGGGGAGATCACCGGGAGCAGCATTAAGAGACGCATCAGTCTTCTTTTTGACCGTTCCTCTGCCTCCCATACCAGGGACGCTTTCAACAAAAAGGACACTGCATCTCC**[T/A]**GAAATATCAGTCGATATTAAACAGAGAATCAAGAATCTGAGCTTGACTACGCATGAGCCAAGAGTTCGGCTGTCATCCGCTGGTGCCCTTAAATGGTTCGTAGATCTGCATTTCTCTTCTTTAGGCCTAATAGAGTTTATAATGGAGCTGTGTTTGGATTTTTTCACAAAGTTAAGTTTCTAGACATCATCTGCAAGGTGCATCTTATGTTCAAGAAAATGTTTGTAAAGCGTTTCAATTTTTGTAATTGCAGTCAACCACATGAGAAGACATCGAGCGACTCAGACGAGCCTTCGTTCA

SNP82

>scaffold6013056 TTGTATAAATATCTGAAATATCTGTTTATACTTTTCTTTTGAAGCACAGTTGCAAATTCAGAGGTGCTGTAGGCAAGTAGCGGTTGACCGTAAGCGTTGCGTTGTTAGAAGTGTTTTAAGTAGATCAATGTTATGGTCATTAGTGTTTGTACCTACAGTGTAAATACACCATGAGAGCGACGTTGCTGCTTGACTCTCAGATGTAGATCCCATGAAATTCCTCTGTGGTCTCATGTATCATTTTTTAATCTTGTATTCATCTCTTCTTAGTAATGGTTTAAGTAAGCCTGTCCAGAAAA**[T/A]**TTTAACGTACACTCCATTGCTTTAGGTTTAGTTTTGCATACGTTACATTACAGATGTGCACAGCTAGTTTAAGGTGAAACGTTTAAGGCTAGCATGTTCTCATTTAATACTAGTGGCAGTTATGGCATGATAAACAAGACAGACCCATCACATTTGG

SNP83

>scaffold133839

TCTTTTAAAATTAAATAAAACCAGAAATTTTAGACTTGGTCATCAAAAAAAGAGAATATATGCAAGTAATCTGCAAATTTATTTTGNGCATTTTTGCAATATCCCCCAAATATTCTTTTAAAATTAAATAAAACCAGAAATTTTAGACTTGGTCATCAAAAAAAGAGAATATATGCAAGTAATCTGCAAATTTATTTTGAAATTTTAACCCTTTTACATTTCATTTATCCATACCGACACAAAATAATTGACCCTAGCTCCA[**T/C**]TTATATGTCACTGTATCCAATCCACTAGCTGTGTTTCAATACCGACAAGCTATTTTTAACATAGTATAGAACCTAATACCCCATTATAAAAAAATAATTCAACAGTGTCTCCCTTATAACCCATTACAACATCCTGTCTACAGAACGAAGACCTAACTGAAGCTTTTATCTTGTTTATGGTAAAATCATAACAACTCAATCATCTCCTAAATAAAGAATCTGATTCAGAAGAGTGACCTTTACGAGTCAGCTTATGTAAGAAATCCTGCGAATGATAAACTCTGCGTTATAAAGCCACCCTCACACAGACACATAAGTTACTGTACCAGCAGCCTGCTGCGCCAGACGTTTCCATGGCAACCCAATCATGTGCTAGAGATGCTCCAGTCAGCCAACACACTCGGTCTCATCAACATCTCACAGTCATATTGTCTTTATGTAACATGCAATAAAATGACTGCAAACCTCTGGATTTAGGAAAAGCAACCGGTTGTTATTAC

SNP84

>scaffold53277

TATATAAACCAATATACATTAAGATTCCTGGACATGAGGCAGTTTCTCACCAGTATTGTTTTTTGTAAGGTTTGTTATTGTAAAAACGACTTAAATGGAAACTTGCACTTAGTGGTGGTTTTCCGGACAGGGATAAGCTTAAGCCAGGACAAGGTCTTAGTTTAATTAGGAAATATAACTAGTTTTTACTGGTGTGCATATGTTAGTGCAAGTTGTTTTCAGTTTGGACAGGTCTTTTATTTTAGTCTAGGACTAGTCTAAACCCTGTCCGGGAAACCGCCCCTTAATGTATACATTTGGTATCAGTATTAGCCTACCAGTGCTGATACGAGCTCTTTAGATGAAAATGTGTACTTTTTGAAAGGGTACTGGCCCAGTAAAAGCTAGGGACCATTTTTTCCCCTAAAATTTGTTATCAGACACCAAACATCCGAAGTCGCCCGGAAGTTCCGGGAGTCTCCCGCATATTGATAGCGAGTGTGCGGTGCCCGCAAATTAG[**T/G**]TACAATCACTCCCGGAATCTAGAACGAGTGAGCAAGAGCGCTCATGCGAGACAGAAGATACTGTGCTCCAAACCGTGTAGCACGCGCACGGCAGAGAGGGAGGGGGAGACCCAGCGTGTGTGGGCTAGTAGTGTGCTTTTGGTACCTCATTAAGCGCATGTAAGACAGATAGTATCCTGATTGGCCAATTTCGGTAAATCAGCTAATCAGTTGTCATCATTGGGGGGCTTTTATCTCTTTTCCCGAAACGAATGAATCAGTGTATCTAGATTCTAAAAACAGGAGCACCATGGCAGAGGGAGAGTGCCCCATAAGTGAAATATAAGACACATTTTATGCCAGACTACACGAAAGTGTA

SNP85

>scaffold70881

ATTAAAAAGTGTCCAAACCTGATCAAGATTTAATAGTTAAAGTCAAATTATAAAAACATGTATGTCCATGTCACCCGGTCATTGTTAAGGGGGTCGTACCTGCATGGCAGCCATACATAAAAACTCTGTGCCCATCATATCGGCATCGACAGCGCATGACGTTGTTCATAAAGTCCGATTCGGCCATGTCCAGGGATGGATTGACCTCGATCTGGCAAAACAAACAAAAGATGTATGAAGAGCTCAGGTGCAAAAGCCACAACGCCACCTCC[**A/G**]TTGAAAGTTAGATAATGATATAAACCAAATGCTCTTGGCACGTATTATACATTCATCAAATACTTTTGCTTAAAATGCGCTTAATCCCAGCCTCAGGTCTTTCAGAAATGCAGATTTAGTTCTCTAAGTGCACAATGACACATAGGATGAATGACGATGTGTATGTCGGATTTCAAGATTCATTATTTTACACAGTTAACGGAGGTTCACAGAATATATTAGGATAATGACAGAAATGTTAAGCCTTTTACCTTCAGACAGTGAAGAGTGACTGAAGACTTTTTTTAAAA

SNP86

>scaffold191155

GCATGAAAATTGTACTACTGATAAACTGTACACTGCCATAGCTTAATTGAATGATTGTGAATGTTAAGCAAATCTGTACATTTCTAACAAATAAACTATGTACAATCCCGTAACGTAGAAAGAAAACGTTTTCAATTTGTGCTCAAATTATGCAAAATCTGTATTGGTGTACGAGCATTTACGGTCCAATTACAGAGGTGTTCCCGGCTAGCAGGTGGACAAGATCGACACTCATCTTGCCGCCACCGTCGAGCACGTGTCGAGCGAGCGAATGTTTGTGAATTACAGTTTATGCTTGACAGGGATGTGTATTTTGGTATTTGTGTTTATGCTGGCGATTTCGACAGTGTGCTTTTTATGAGCAATAATGGTTTCTCAGTGGGAAGGCGTCCATCTTTTTGTGGCGCACTGGCTTGCCCCAGTATGAAATGGCCATGTTGCTTAGTTACAGGAGAGGCTGCTCCATCAAGGAAAAACCTACGACTAGGCCTCCCTCCCT[**A/G**]GAGCCAGTGCTATCAATGTGGACACAAAACACAGGAACATTGGACCCTAGCCAACACAGAAGAATGGCTAAACCAAAAAAAATCAAAGAAAACAGTTAATGCTGTTCCTTTCAAGAATAACATCAAATATAATATATTTATATTATATATATGAATTTCCCACATAGAAAATGTATACCCCTCTT

SNP87

>scaffold1119059

CCATGTGGCGCGCATGCACGCTCGCGGTGTGAAGAGCGTCCATACTATTTGATATGCACTTGATGGCCTTTTTGCTGCAAATTTTTGAACGACCTAGTTAAGGCGGTAAGGTTTCCCAGCNGGCGTCCGTGCTATTTGAGATGCACTTGATGGCCTTTTTTGCTGCGAATTTTTGAACGACCTAGTTAAGGCGGTAAGGTTTCCCAGCTTAGGGGGCCGCCCAAACTGAAAAGTGCTGCGGGAA[**T/A**]CCTTGTACACAGACTCCCCCTACAAATATTCCTCCAGCTCATCTGCATGCATGTTTGGATCTAAAACGTGTAAATGTCGTTTGCTGATGGGGGAATTTTAGTTTTCCCAAGATTACTCTTGTTTAGGGGAATTCTTTCTGCATGAGGCCAAAACGTGGACAAGGCAGAAGAGATTATGGTGCCAAATCACGTCTCAACTGCAGACACTCAGTCAGTCTGCACATTTATAATTGATCTGAAGGTTTTGATTCCTTCATACAGGAACACTCGGGCTGTTGCAATTCATCTCATGCTGCTTGTCACATAGGGAACCAAACTAGACAAGAAATTCGGTCATTGCATCATAAAGGCTGCTGCGCTGTTGATGCCTTCAACTGTCAATCGAAATCTCAAGGGCATATATCTTAACATTAACAGGTCAATCCTGTTACTGATGATGACTTGAACTTTGTTCGCACTGCAAATAATTTCGAATTGTGGAACTGCTTTGTGTAGGATTG

SNP88

>scaffold1027357

AAACACTCATAAGTGTGACTGTTTTATAACATACCTTAACAGCACCCTAAACCATGCAGATTTGGCAAAATATCAAGGTCTGTTTCTTTTCCTTCATCTGAGTTTTGCTTCTTCCTGTCTTCTGCAACTGCGGAGAGCTTTGAAGATCTCTGATGTCGAATCTGGGTTCAACTTACTCACACCCCTTGTACTTTTGCAGTGAATTGATTTTCCACGCTCATATCAAAACGTCAACACGATTCCCAATTTTGCGTACTACATTAGCGTGTCAATGATCGGAAAACCTCTGTTTATAACTAAAAAGCCTCCGTAACTTGAATCTTGAATACCATTCCGGTTGAACCTTTAACTTGATTTTACTTATTAACAGGATTATCTATGGATGAATGGCTTTAAGAATGTCTGAGTGTGTTTTTATGCGCTCTGTAGTTGCCATGTTTTCCTTGGAAAATCCCCCTAAATGTCTCCTGTGCCACAAACTATTTACTAGATCTCCTCT[**A/G**]TTAATAAGCCTGTATGCATTTGAGTGACATCATCAAGCTTGTGTCCCACACTTTTCACCTGCTGTGCGGGGTTGGGGGGTATATCTTTTTCATTTATACGTGTAACAGTGCACCTCCGTCATGCTATTGAGCATAGTCTTGTCATTT

SNP89

>scaffold932669

CAACTTTTATTCAACACTACACAAATGCCAATTCTACCTTACAGTCATTTCTTATAGTCATACAAAAATTACTCTTTAATCTTTAACCTGGCGCTCGTATGTGTATATTATTTAGCACTTGTGCTCGGGTCATGGCCACTGGGGGACCGCGGTTTAAATTATATATAAAGAAGACCAAACCGTTTGGAGGGGGACTGATAGTGTGATATTCATGATGAGATACATACAGCAGGTCATTGAAAGTAAGTGTATAATTTATGTCAACCATCACTGAGAAACATCTATTGAGGTATTTATGAAGAGTCTGAGTCACCAAGCCCCCAGGAAACCTTGAAATTATAGATCCGACCAGCCAATGCTGCCATTCCATACAAACAAAACAAATCAACTAAATAAAATAACTAAAACAAATACATAATAAAAATACGTTGGGGTAACAGGTCACACATTGGAGTGCTGGTGCTCAAAGTCAAAAAGTCTCCACGTATACTCCATCACT[**G/A**]TAGCCATTACACTGGCTACAGAGTGCCTCTGTTTTCTCCCAAGGCTGTCTTGCAGACCAGCCTGTCGCTCGCCAAGCATCAATCAAGCGCCGTGTCCTGGCACAGAACCGATCGATGGCCAACACAGCATCTCATTGATAGAAGACAGCTCCTGACTAAGATATAGCATAACTTTTCTGCTGCCTAGTCTAGCAATAATCTCCAAGGTCAATGGGAGACGCTCAAGATGGCAGCGTTACACAGATCCTGGCTTTTGAAGCCACAGCGCGCACCGGGGAAATCGTTAAATCCATAACCGGCAGCTAAAAAGCAGGGCCCCCTGCTGGGATCCATCTTATAAGTGAAATTCTGATCTGGCCTGCTTCACAGGCCAAACAAACCTGAGATCTAGGAGGCGGGCACTTATTAATTACATGTATTTTATTCACAATGCCTGACTAATTGCAAAATGGATGTCAGGTATTTCAATAAATGCTTAGTACAACAGTCTTTAGGCCTAC

SNP90

>scaffold733095

TTAATATTTATCAGTATGTGTGCTCTCTGTGTATGTGTTCATACTGCAGGTTTAGCTCACAAAAAAAAAGATTGTGAGGTCATTTGAAGTGGACCACATTATTTGAAAGGCTCATATACTGTATCAGACATTTGTGAGATTTCTGGGTCTTATTCTCAGGTGAAATATCTAAGCCATTTAGTCTCCAATTAATGGAAACAACTGAGATTATAAAGCTGTGATTTTTGTTTCTTATTTCTTATAAC[**A/T**]AAAACACTGGGTCTCCTTGAGGTTTCATTGATATAACTTCTTAGGTCTGTTTTCAGTGCTATTGTTATTTCAACTGTACCCACAATACCTAACAGCACTGAATGTCTATCTACTATGTTTAGATTGTTGTATGTCTTTATGGGCCATATTTACTAAACGGCACAAATAAGCGTTAGAGCGCAATTCCAAAAAATCCCCCTCAGGTGCAGGTGATCTACTAATGCCTCGTGCGCTTAAGTTCAGCACCACTGACATCTCAGCTAAAAATTCAGAGTGTCTCAGTAAACAGAGCCGTAGTACACTGAAAAAGCTGGAGGACCAAAAATTAAGGGTTACAAGAAGTTTTGAAACACCTGCTATT

SNP91

>scaffold724959

CGGTGAGATTTAAGAACTTGGAAAAATTCATGAGGTTGTAACCAAGAGGAACTCATTGGGTTAAACATTACTTGAGCTGTTCCTCTTTTAGAGATTACTTCCTAGAGGGAACGAAACATAATTTGTTGACTTCCCCTTATTTGACATAAGATTGTAAGCCAAGTCTCATAAAATGTCTTTGTTCCAATATGCTTCCACTTTTGCAAGGAGGAAGAAGATCATCTGGGCTACTGTCAGTGGCCAATAAAATACTAAATTCTGCTTCGGCGCTTATCGGCATTTACTCACGCTACGGTAGATTCTGTAATGATCACACATTTTATTGCTTGGGCACCAAGAAGACTTTCAAGCTAAAGTTCTCAAATGTATAGAATATTGGATACATTAGGCTGGCTACATTGTCCATACGTACTCTCAGATTCGAGAATAACAATCACAGCCGGAAGGACACAACCAAGGAGTTTGCTTTCCACAACCAGAACACATCCTCTCCAGCATG[**A/T**]GCCACAGAGAGTCTGTTGTCCATGAGAGAGGGCCAAGACCGGGGGCGAACTGTAGACCGGCCCTGTGATCTCTTTAGCACCAGTGACAGTCGCTCTCCGCTAACACTATGGAGATGATTAGCCAGGCAAAGAACTAAGTCACCTCCCCTACAGCTAGACAAGACGCTTCCCAGACACGGTGCATACTGTGCCACACACGCTCTCACTGACACCCACGCGGTCAAACGCAGATGGGGAAGTAGCGTGTAGGCGCAAAACAAATGCAAAAAGCAACAACAACAAAACCACATAGGTTGCATACGAGGACCAAAACATGTCTGTGTAAATGCAGACAGAGTGTCACCTGCCATGCAAAAGCGAAAGGCATCGTAAGTCGCCCAAATGCGCTTTCTTTGCTTTTTCCTCGCAATTCTCTGACGCAGCGTAAACTTGTTCTTTGTTCCGAAAAAGCGCACGGTGTTAAGTTACCATACCCCGCAAGGTTAAAGTCCGTAGTCGTT

SNP92

>scaffold651291

CATATTTTAATATTGAAAATGAGTGGACTATTCCTTTAACAAGGATTCATTTCAGTCAAACTTTAAAAAACAGCTGGGTTTTAATCTGATGTGTTGTTTTGTCCGCAGTGCTAAGCAGTTAGTTCGTGGAGAACCCAATGTTTCTTACATATGCTCACGGTACTACAGAGCCCCTGAGCTCATCTTTGGAGCGACTGACTACACCTCCAGCATAGGTATGTTATTCTTAAACATC[**T/C**]TACATGTTCTCCTATGCAAATAAATCAATGAACCACTGAGTGAAAATAAGTGCATTCACTAAACATTGGTATTTGTGTTTACCTGGGAATCAAACCAATAACCTTCGCGCTAATAATGCAATGCTCAGCCATAGAGTCCCGCAGGGATGACGTTTTTGTAGGCCAACCCGGAAGTTAGCGGGACACTGGTAAAGCGTATTAATTTTTCCCCTAGACTTTTGGATTATTCTGAAAAATAAGCTCCCGCTAACTTCCGAGTTGGCCTACAAAATACGTCATCCCTCTAGCACTCTTATTATATACACACAACTATCCCATTTGTAAATAAAGTATAAACATAGTAGCTTTNGGCACTCTTATTAGGCACACAAAACTATCCCATTTGTAAATAAAGTATAAACATAGTAGCTTT

SNP93

>scaffold524405

CTGATATATAGTCTTTCTGTCTCCAAAAATCATCAATTGTTTCCTGTGAAATATCTCCTACTGTGACAGCTGCCATAGCGCCTGTCACCGAATGTTAATTGTTTGTCCGAGTGAGTGGAGGGGGCGTGGCTTAGCCATAGGTCAATTGTGATTTTAACACATAACTTTAAAGATATCTGTATTTCCCCATTTAAGTAGATGGGACTTTAGCCTTGCATGACTGTAATACATGCCCAGAGGCATTGCAAACATGGCTGCCTAGTGGCGCGACTTTCCTAAAGGGACTTGGCAATATTCAGACTATTTTCAAAAAAGCACAAACGGCCCATAACATTCAAGTGAAACATTGTTTCATCCAATTGAAGCAAGTGGTGGAGGTGAAAGTGTTAAGAGGCTGAAAAAACATAATAGAATGAACTCACAGAATCGCAAATTGTGAAAAGTTTTTCCTACATTCAGTTTTCCACTGTGAAATATTTAAAGCTCTTACCTCCTCTCC[**T/C**]TCATCGACCTCAAACACTTGGCTTGGAAGCTTCTCTGTCTTCATCCCTTTACTGAAATGGAAAAAGCAGCTTAAACAAATTTCAGAAATAGCACTGTGAAACCTTTGGCATATAAATGGCAAACTTCAACATACCAGGGAAGCATCCGGAAATCTCCCGAGTAAGCCTCGTAATTATAGTTGATGATGCGCCAGTCAGTGTTGTACATCTTAATGCACTGCCAATGAATGAAAGTATTGCTTATTAACTCCATCACACAAAGAAAGACACATAAAAATGT

SNP94

>scaffold257317

TTACTTATTTTGTTTGTAGCCTATTTAAGATTAGTTTTTTTGTTGTTGTTGCTGCTAGATCCCTCTTGACAAAACAACTGCTTCATCCATTGTGACATCCATTGCAAGATTCACTGCGAGATCAGTGGTGTATTAATTAAAAGTCAGAGGTTTCGATATATTTATATTTTTGAGACCTCCCGCTTTTAGTCTTAGAGAGATCAGTCTCTACTAAAATGAAGCCCTGGAGGAAAAAAATTAAATGGCGTAGCTTCTGCTGGCCATGGCAGTGCTCAAACCTCAAAAGACAGCAGTATGCCAGTGAGGTTTACATTCAAACACAGGCATATTTCAGTGAAACAGAGATCCAGCAAGGAACAGATGCGGTACCCTCTTCACCTGACAAAGTGGCAAAACCATTAAAGGATCATGTGACGCCTCAGCATCAAACCTCACTTGATGACTTCGAATT[**T/G**]TTTACACATTCTCCAGCCATCACATTGGTAGAACCACTGGTGATTGAAATGACCCCTCAGCACCAAACTTCACCTGTGGAAGAAGAACAACTGCCAATGAGGCCATCGTTCACAGAGAAAGTCTTGACTCAGGCACAGGCAACAGAGCAAGAGAGACCTCCTGAACACTGTGAGGAAAGAAAGATAAGAAAGGAGCCACTGGTGATTAAAGTAACCCCTCAGCACCAGATTTCACCTGTGGAAGAAGTAGAACTGACACTGTGGCCATCCTTCACAGAGGAAGACTTGACTCAGGCACAGGCGACAGAGCAAGAGAGACCTCCTGGCCACTGTAAAAAAAGGAAGAAAAGAAAGAAACCATCGGTGAACGCAGTAACCCCTCAGTGCCAGATTTTACCTGTGGAAGAAGAA

SNP95

>scaffold5465595

GAAACACTGACATAAACAACAAAACTGCATTTTCCATCCACTCCGATGCTGATGTAAGATCTACAGATGTTTTTAAATGAATGCGCTATGGTGATGACAGAAGGGACGACTTGGACGAAGGACAACATGAACGTTGGTCCAAAAGCGATGACTCAGCCTCCAAGTGT[**C/A**]TCTAGCGCGAGTTCTTGATGTTCTCCACAATCACTCAAAGCAGAAGCTGAGAGAAGACACAACAAATACTGCTGGCTTTCATTTCTGCCTGGTCTCACTTTTCTGCTGAAATGGCAAAAAATATGCATAGGCATCTA

SNP96

>scaffold1687615

GGACAAGTTGTCAATAAAGCACAAATACATACAGAGAAGGAGCACAAGGATATTCTGAGCTATACAGATAAGTGTATGTGTGAGTGATCATATAAGCATAAGTATACTGTATAATTATGTGTTTGCTATGCATGCATTATTGTATTTATATCACATCCCTGCTATATAGTATAGGCATTACGTATAGTTTACACAGGTCAGACTCTGATTCATGTGGTGGTTAATCTGTGTTGGGGACTTGCTTTGACACACACACACACACACACACACACGGGCTAAATTTAATTTTGCACGCCCTCTCCCTTTTTCTCACTCTTACAAACTTTTTTCTCAGTTACACAAAGACGCACACACATACACACAAAATCTGCTGGTGTGGATCTCCCAAACCGAGAGGGTGTTTTTTACAGGTTTCATGCGCACATTCTATCCCTGACAGTGTTTGGATCAGACACGCGCACACGCATGCACACATATCTACGCAAACAAACACACACAC[**A/T**]CGCACTCCCTGCAGTGACTGACCTTACTTCCAGAGTCCTTGGCTCCACACTCTCCCTTATCGTACCACCATTTGTTTTTCAGCTTGTCTAAGATGCCTTGCTCACTGAGTTTCAATACTGCAAGGTTTACTGGCGTTCTTCGCGTATGGGAAATAACATAAATAACATTACCAATGTTATTTTATGTTATTGTCAGTAACATTTGCACTCGCTAGCAGCGCTGGTAATGATTCAGCCCTGAGCGTGGTGGCGATCGGCAGTCTGCGCTCCATTTGGCAGACGGCAAACACGGCTTTGCCGTGCCAGATGTGCACAGGCTCATCGCCGCGAGCGGGAAGCAAACACAGGGCCCGTCTACAAGCTTCACACCCCTGGACGTATATTCGGTATGTATGTCAGTTATTTTAATGTTTGCAGTGAATTGCTAGATATAACTGGTTAGCTTGTTGACTGGGACACTGATAGTGCTTCCCGCTCGTTGACATTTTCATTTTTTACCC

SNP97

>scaffold1680807

GCTGTTTAAATTGTAGTCAGCTGAGGTTTGGACCCAGAAATTGTATTCCTTACGTCACAAGTTAACAACTAGATTACAAAGTGATAAATGGAAACTAAAATTCACAGCAAACCAACAAAAATCTCTGATATTCCATAATTTAATAAACAATTCCCTGACTTTTAATGTCTGGAAGGGACCTTTAAACATTCAATGATATTCCAGAAATTCCATGACCGTGAAAATACAGTATGACTAGACACTAAATGTTAATTAATGTTTACAAAACAAAAGAGAAAGCAATAAGTAGTAAATAATTCGTAATAGCACCGATAAACGGGAATAAATCGCTGTTGTGTTTGTTTGGCGGTTTTCTTTGAACAAAGATCCCGGCCTTTCCTCTTCCCGCCTAATCTTTCCCCTCCCCCATCCCATTAGATCCCGACATACCAGATTTTCCACAAACGCCACAAACTAACTCAACAAACGCGATAAAACAGATCACAAAAACTCCCGCTAC[**T/C**]ACACCGAATCCCCGTTAAACCGTTTAAACGCGCGCGCTCCGGTACTGCACGATACACAAACACGCGACGACTCTCACAAAGCGTTAACAAGCTCAAACTAACGGCCGCAGCCTCACATAAACATCAAATATACGACATGATATTACCGTACACGGCGATGTGATCGAACTCACGACTGAAATGATTTATAAATCTGAGATATTTAAAGTTGTACAGACCTGCTGCTCTTTATCTCCGTCAACCTACGTGAGCGTCTCTCTTGTGTCCTACGTCACTCACGTGACCTCTACTGAGCGTGCGCAGTGCTCACAACAGAACGGCCTGTCCTCCTCGGCAGCTGATTGGTCAATGTTGCTTTGCGTGCAGAGAAAGACGTCCAATTGGCAGGCGTACCTGGAGGACTCCGCGACACTGATTGGTGCATTGAAAACCCGAGCCTGTTCGAATGTAGTAAACTAAACAACTCAACAACTTTATACAATACAAGCAGTCATGTTGAA

SNP98

>scaffold1653877

ACAGTAAACTTTGATTACGCAATAGATTATGCGAGTATCTGGCAAACGCGAGCATGTCTTTTGTTATAAACCCTTTAGACGCATCTGCAGCAGGCACTTATTTTGACAAGACACGTGATGCACATAGGATAACTCGACGCGCAAAACACATATTTTGAAATGATGAACCACACACATGACGGGCTACATACATGTTGTGACGAACTTCGCATCAAGCGCCCTCGAAAAAATAAGTCACCGGCCGCCACTGAGCAATATTACGTTTTTCTGCATTTGATCGAATTAAATTATAGTTTAAACGAAGAGAAAATTTAGATTTTTAATACGCAATTAGGTGTTCTGAATTTTTTATGCACAGAGGAGATAAAAATGAATATAATAGTGCTTAGTGTTTGTGTGAAAATTCCCACAGGGGATTGATGTTTATATTGTGCCTCTTCGTTAATGATTGATTGATTATTTGTAGTCGATTTGTTAAGACTTGTTTAATTTCCAAACC[**G/A**]CACACGACACCTCCAGAGGCTATGTGGTTTTAAAAGAAACGTGTGTGAGCCAACTGAATGCAGTGTTGCAGTCCAAATTTGTATCTGCCAGGAGGGGGCGTCATAGGCACTGCAGGATATTCAGGTTGTGTTTGCACCTTTCAATTCCCTCTGCTCGGACATTTGTGTGGGAAATCATTGATAGTTGCTTTATAAACACAGATTAAATTCATACACAGACTAAATAAGCACATACATTTTAGTTAAGGTGGTTAAATGCATAAACACAACAATCATACAACCCCCTGTTGTCTCATCCTTATAGTGACTTTTGTTGTATAGTAAAATATTAGATTTTTCAGGTGTTTTTTAAGATATTGTAAACAGTTTGTATACAATTAAAATAAATTGATTAATCCAATTTATTCTTCTTGATAAATATACAGTACAGATCAGAGATCACTGATATGCATTTTTAACCAGCAGTCTCAGTGAGCAATACTTCTTAATCTTAATAATGG

SNP99

>scaffold1566461

ATGTGGCCATTTGCATGCGAAGATTTAAGCTTGCAGCAAAAGTGCAACATTGTTCGCCGAATGTATGTATGGTTTCCATGGAGATAAATCGGTTAGCATACTAACAGTGCTTAAGTGTCAGAAGGTCGCTGATGTTGCACATGGCCAGATTTGGCTGAACTGTGTGTACAGTATTTGTCAGGCCCAATGGAAAACTATATTCATTGGACCTTGCTCTTTCAAAGCTTAAAGATAAAGTATTAACTTAAATAATACAAATAAACTAAATTATAAATAAATTAGTAAGGTTATATTACAATCTTGGCAAATGTGTACATGAAAGAGATATATAAGACAAAAGTGTCCACTGGCTCTCCATT[**T/A**]ATCCTATACTGGTGTCTAGTTGGAACAACTAAGACAACAAAGATGTCTCATTTAAAATGTATTTTTAAACAGCTGACTTGAATGTCAAATGTGCTTCTCCGGTCTTTGACGTTTTTCCTTCTCTGCTCTTAATCTCTTTTCATCAGCGTGAATGTTTGATGTGACACATTCTTGTGTGTCCATTAGCGCTGTTATGCTTTGCCAAAAATGAGCCAATTCTCCGTTTCCAGCATGAATACATGAATATAGACTCATTCCATGACTCATTCTCATAAGGCTTTTATAAGAGTTAAGTGCTTTATTCTTGAAAGAGGAAAGGAGATTGAAAAGTGAAAGTTAGGAAACCAAAAGAGGAAAAGAATGAATCAGAAGTATGGATACAGTAAAACAAAAGGGCAGGGAAGCTCTAAAGCTCCACTCCTTGGTTGGTGTGCTTCGGGTCATTGTCATGTT

SNP100

>scaffold1561049

TACGCCCTTAAGTAAAGATGATATTCCCATGTGGACCATCTCACCCTGATAATGTAAACAATCATAGATTAAAAAAAGTTTCTGCTGCTAAATAGCAAGTTTTATATACACATACACTTTTTATTTTGATTAAAATGAGTGCTTTTGTCTAGTGACTAAATGAGATCTGTGTGTTTCAGTGTGAAGATAAATCCATTTTTGTTCTTAAATACAGATAGTTCTGTCTCGGTGCAAGCAGACACACTTCTTCAAAAGCGTTTTCATGATCTTGGCCAGAGCACAGAAGCCTTCAACTCGGTTCAGTATGTTGGGACTCAGACCATCACTCCACCTACAGACTACTCACATTTAATTCAGATAGTCAACCAGCAGGTGAACAACACAGCCAC[**T/A**]CGAGCTCCACGACAGCCTGCCATCGTGTTCAGTGCACTGAAGGTAACTCGTCAAAGCGGCTCTAAAAAGGGTTCATTTACGCCACACTGTATTAATATATTTATAATAATATTATAAAGCAATTCAAGTGGTACTCTTTAAAGAGAAATACTGCTAAATACATTGAATATTTAGCTGAATCTGATCTTCACTGCTCTGTCTTTTCTCAGGCATTGAGTGACAGGTTCTGTGGAGAGATCTCAGATGAGAAAATCAACATATGCTCCTTCTTTCCTGACGAATATTTCACGTGTCCATCAGCCTGTCTCAGCTGCAAGTAAGTTCACTCAGTGCTCAAAGCCGAGTAGATTGAATGCACACTGATGTAGCATGATTGCAGAATAATGAGGAGGAGGATACTGCTTCATTGTAACCCTCCAAACTTTAATGTTATCACCAATGTACAATATCGCATACTGCGGTACGTCCTGAATTAAGATTAAGTACCTACTCATTGACCG

SNP101

>scaffold1300913

AAATTATTTTGACAATTCTGTAATCTAATTTTGCAATAAAGATTAACAAAACTTTGTGTTGTGTTTGAATTCACTTAACATTTTTTTTAACGGTTATCGGCCGTTACTGCCCACCTTAGTTATTGGGAAAATCCATAAACACAAAAATTCAAAACATAGGACCAGATTTACTAAACAGGACTAATTAGCATGAGCGCAAATTCAAAACTGCACAGATGGAAATGGACACTTCTGAAGGTGATTCGGTAACAACGCAGACGTTACAAAAA[**C/A**]ACAGGAACAACATCTCCTTTCCATAACAAACAACACAATTTGAAGACATTATTTTAGGCATTAAATGTCGCAAATATCAGTAAATTGACAAGCACAAATGTTAGTAATATTAGGGCATTTAGATCAACAACATCTGCGTCAAACATTATAAACATGATGATCATCTGCCAAATCGACTATTTCAGCACGTCCTCTACGTTACTACAGAGAGTCCGTTTTATTGACAGCTTTTTCTCGCTCCGCATGAGCAAAACGTTTTCATTCTGTACTTTTTAACTTGCATATATTCTTACATATTTTATTACTGTTGGGTGACTGAGGTTTGCTTTTTTCAACAAACACTGGAATGACCATACAAGAAATGAAGAGTTTCTTTGCAAAACGAGATAACTCCGGTTTTAACATTTTTGTCAAAACATGTTTATTATTAAGTTATCACGTTATTATTTTGTTTTGTGGTGCTACTTAGCTGTATTTTTTAAGTTATGAAGGTTTAAATC

SNP102

>scaffold1296111

TACACACAAAAAGAAATGACAAGATAAATCGTTCTCAGGTTTTTTAGCTGTCATTCAAGACATCTTTTTGGCACATGTGCAGCTTAAAC[**G/C**]GATCACTGACACTCCTGAATAAGATATTGATATAATTTGTTATCATGTAAACTTTGAGCACATATGAAGTTGCCTTTCCAAGGTGCAGCAGCGAAATCCTAATTTCTTTATCACATGTTTGCATTCTGGAATATAAATTCTTATAGATTCCAACCCTGACCTACAAATTTTCCAAATAATCTTAGTCATGCCATTCAGGAAAATAAACAATAAGGAACAGACAGTGGACACCAAACATCCCAGTTTATGTCAGAGCTGCCGGCAGGTCCCAGCACAGCACATAATGTACTCCAGATAAACCACAGTAAATAAACCGCAGAAAATACTTAACAAAATGTTGTATAAAGCCAGATGAAAACACCTATTTCTCAGACGCTGCAATTGTATACAGCCTTCAAAAGCATTCAGTGTGTGTGTGGCTTTATGGGTTCCAGTGCCAAGGGGGTCAATGAGCGCTTGCTATAGGTACAATCTTAAAGGAAAACAGTTTGTAATCGTAT

SNP103

>scaffold1237301

TAAAACCACCACTCACCTACAGCAAAAACACCTCTATGTTTGAAATAAACAATGTTTACTCTCTATTTCAGTTCATTAAATGGGCTGACTGCCTTCTGGACCAGCAGGACTTCATTGCTTTGACAACCCATCAGGATTTTAGTAAAAAACTGGTTGTTTCAGAACCAGCACCAAACCAGCACTAACAAACCTGGATCAGCATGAAAACTTCTGTAGAAATCCATCACGTTACACAAATGAAATTGGTCACGAATGCTCC[**C/T**]TAATGTTGACTTCAGCGCGTAAAATAGAGATGCTTGACAGAGGAATGGATCTTACAAACAGTAAGCGACTGCTTCTCTTCTCCAAATGTTAATCACATCTCACCTGTCAGTCAGAATCAACCAATGACACAGCACGAGAGAGAAAGAAAATATTTCTGTTCTCCCTCAGGTCACAAACACAGTGTGATGTTTTAACTACTTTAAACATATGTTAAGGAAAGAGAGTCTTTGAAACATGACGGAGGTCCCACGGGGGTCCACAATCACATCTGCTCAGATATTCAAGTGTAGGCAATCACTTCACATATATAATCACTGTAGACGGGTGGTGTACTCAATGTTACTCTAATACAGGGATTGTAACATCATATATTTGCAATGTTCTTAGCTCTAGAGTTAAGTACATCTTGATTGACATGCAATACTATGTAAATGTCGACAGCGTTGACAAGTGACCTCATTCATGAATCTATATAAAAATGTACACTGGCAAAAAATCC

SNP104

>scaffold5985248

ATTTTGGGAAAGGTAATATCGTCAGAACAATCAGAAATGCATTAAAGAGAACCGCATGCCTTTTAAAACAACATTATGGTAAATTGTTGCTGGATTTTGGTCAAAAACAGCTTTAAAACACTGATAACTCCACTACTTGGTGTCTTGGCTCTCACACAGATCCACTTGGATTACGTGTCACTATACATTTATGAGATTGAGATCTTTTATCTGTTTTTGAGAATAAGAATGGATGAAGTAATTCCTCTTAGAGTCAAGAATTTATTTGAACAATGTTTAGAAATCTGGCAACCTGACAAGCCATACTTTCCAATGTCAGCATGTTTACAGTTAACCAGTTTTAAAAGCTTTTCACACGGAAGAAAAAGTCTCCATAAAAATGAAATGACACAACTCGTGACAGAAATTTATGATCAAAATATCATGTTATGCATGGTACGTTTACAGTAAAACAGGTGCAAGCAGCCGAATAAGACTAAAACAACATACTTGTTCTCCT[**C/T**]TGCGCAGTGATTCACAGATTCAGTTAAAGTGCTCAGACTTCAACAGATGTTTACTTTTGTTTAATCATTCAAGTATGCACTTGACAGGGTAGATTTGTTACACAGTACATCAGGATGGACGGTGGGGAATGTAAATAGGCCATTCATTGTAGATAGGATCTCAGTATGATCTCAGTTACTGTATCTAGTCATTCTGGACCATTGCTCATACCCTTCCAAATATTTAGACAAATACATCTGCAATATAAACATGTTCTTGATTTCACATTTGTTAAATCAAACTACATTTCATAAAGAAAAAAATGGAAATAAT

SNP105

>scaffold5981314

TAAAAGAGATGAACCAAAGCCAAGCATCTGGCAGCGGTGTGAATTAAGTGAATCATTTTTAAGAGAATTTTACGGCTGTTTGCTTAGAAAAACTTGGGTGTTTAAACGCTCCACGTGTGGCCTGCCAACACAACAGACCTCGGTGGCAGGAGTTATATTAATAAGAAAGAATTTCTCAAATGACATAAGTGTTGCCCCAGGATTATTTTCAAATAAATCGAAATTGAGAACAAATGAGGTTGGTTTTGTGAAGCAGCTAATAGAGTCAAACCCTTTACAGACTGGCTTGCAATGTTTGCATTTTTTGGCCAATAGTATTTTGGATGTTTTTGATGGCTGCGCTTTAAAAAAAAGCAGAGACGAAAACTATTTATTTTTGCAAGAAAGCCATTTAATTCGGGCAGCCCGGTCTGGTCGTATTTGAGGTAAGGCCCCACATTTACATGTGGTTACGACATTCAAATGTTGAAATATGAGACAGGC**[G/T]**CTCCGTTCCCTGCACAAGTTGTACATTACCAACACAACCACAATGAATTACAAAAATGTATGATCCATACAGCAAAACGTATTATGTTAGGAAATGCGTTACCAACCCGTTCATATAATATGACATGGGGTGATCATTTTTGTCCAGTATGTCCACTTTTTAGATGACTGATCCATATCAAATGCACATCGAGTAAGGGCTAATGGCCTGATTCTTATCCTATTTATAACATGGTGGCTTACCGAATAAAGCAATAGATATGAATAATTGATGAATTCAACTTATGTTCCTTTAGCTCAAATTTAAAAACGATGGTGCTTGCGATGCCAAGGTTGTGGGTTCGATTTCCAGTGAGCACACAAAATGATAAAGCGTTTATCTTGGATGCATCGTAAGATGTTTTGGCTAAAAACTCATACATGTAGAATTA

SNP106

>scaffold5966298

CATTTAGAGCACACTTCTTTAATGCTAGTGTGATAACTGCTTGTAGAAATGTTGTTTCTTGGTCACCATATTGTTTATGAAACACTTACACTGTGGGGGTCCCTACTTGCAAGCAGTCGGAAAGCTTGGACAGC[**A/T**]GCTCCCTGTACTCTGGTGGAAAGTTTTTTAGCTCCGACTGAGTATCCTGGGAGGAACTTTAGGATAGTCTTGATACTGGAGGGATGAGCTGCATTTCCTAAAGCCTTCAGGGCAAGAACCATGTCCTCTTCAGTGTTTTTACCCAGTGCACCAACAGCCATATCCAGCAACGGCTGGATACCATTATTTACAAAAATAGAGAGGCAAAACCAATAAAGACATAAGTTCTACCAAACGCTTACAGGTTAATGGATAATATTGGTATACATTATCTCACAAGCAAAGAGACAAATAAAGGACCATATATACCTGCACTACTGTGACAGGACAAGGATCAGTATAAACACAGTATCTGTACAGTAGAGAACCATATGCTAAAACCACAGTGTTCCACAGGAGACGATGCGATTTACTGAAGGGAATTGTCAGGAACTCCTGAAAGCAAATCAGAACACCATAATGTAGGAAAATTGCAAATATAACTCTCGGTGGTGATAAAA

SNP107

>scaffold5934562

TCAATACTCACATCATCCTCATATCTGATGTGAATACTGGTGATTTTTACTTGAAGGTTTTTGATAACTTGTGTAGCCAGTTTCTCAGCGAATGTGTCTTTCTTTTCCTCCTGTGGCTTTTCTGCAAATAAAAAAAGGTTTACTGTAACTCCATCCCA[**T/C**]TAACCAATCAAATACCTTTTGTAGCATTCACACTCAACAAAAGCAGTTTTTGAAAATATCTGCTCATGTTTGTGGCTCCAATCACAGTCATCTGCAGCCACCCACCTGCTTTATGTTCATGCTTTTTAGATCTCCTAAAGGGTTTTTTATGCTTTTTAAGCTTACGTCCTTTGTCTTATAAAGCGCAGCGTTGGGAGAAAGAGAAAAGCCGGTCAGGAAGAATAAAATGACAGTGCATACCAGTAAACACGCATGCACGACTAAGAAATGATACGAGAATTATTTAAATGAATGCACATACATGCAGTCATAGACAGACTTCAACAAATAATGCACAGAGGCGCACAAAGAAAAGAGAGGCAAAAAGTTGGTCCCTCAACATGTTTTTCAACACATCACATAAATCAATGAACGTCTCTCAAAACAGAAGATGGACAATTGACTGCTCTGCTACTGCAGTGGGTTATGTACGTACCCCGTGGGTTCTTATACACATAATT

SNP108

>scaffold5855525

AAAAAAATCCTAAATCTGTTAAGCATCTCTTTATTTGGTTCTGTTTTAGAAGTTTCTAATGAAAACATACTGTATAAACACCCTTTTTCTCTCTTTTGAATGTTTAGCTGTAATTCTTTTGACCTGTTTACAATGTAGTGACAGAATTTAGATTAGCTGATTCCAGACAAATACATACGTCAACTCAATGAATTAGGATGATCTGAAATAAAAGAAAATAGCTACTCACCCTCCCA[**G/A**]AGGTCGACTGTTTGAAAAATGTCAGACTTGGTGACTCCGTAGCGTTCGGCAGCAACGAGGAACTGCGAGATCTGCTCCATCTGTTTAAATGCCATTCCAGAACTTTGGATTTTTTTTACAGGCTTTGAATCTTTACAGAGACTGTTAATCAGATGACATAAAACCTACGATAGAAACAGAAAGGAAAGAGTGAGAAGATGTATGGATCATTGTTTATTAGGGATAATGTATAGGCATCCGGTTGTTATCACAGAATAAGCCCAGATCAATGTGATCTTGTTTCACACTAAAAGGGGTTACTTAAAGGTGCAGGGTGTAATTTTTAGAAGGATCTTTTGA

SNP109

>scaffold5655771

TGATGTCACTTTTCGTACCTTTGATATGGTACTCCTGCTTGGTAGGGTCCCACGTAACCCTGGAGACCCAGTAGTTGGCCACGCCCCACACCACCTCGCTGCCCCGCCCTTCCTTGAACATCTCAATGTCCTACATGAAGAACAAACAAAGATGTTCGGATGTGTTACTGCGCTGGTATGAGCAATTGTGTGCTTGCAATATCTGTACCTGTGTGAGATAAAAGTATTGCTTGAAAGCCA[**G/A**]AACCACGTCTCCATTGATGTGGATTTCTTGCTGTACTATGAGGTCATCTGGACAAACGTCACGACCCGTTACTGCACCCTCCCATGGAAACTTCAACCCCTGAGGAAAGAGAAGTGTTTAACTTCGACCAAAAATGTGTAGTAGCACTCATA

SNP110

>scaffold6022508

AGTGAATAAATGACAAATTTTCACTTTGGGTATATATATTATTATATACATTTAGAAATTCTTAATTTTTTATTTAGAAAACGAAATAGGGACAATAGTCTGGAAACGTAAGTATTTTTTCCATACATTTCCAGACCTGGAAATTACTTCAATCAAATTCCGTACTTTTCCAAACTCGTAGGAACCCTGAACTTGTGAAGTTGGGTGAACTAGAAGTGGAGCTGATGTGAAAGCTTATTAAAAGGTCTTTATGGCTATGGAGGCTGTTGAATTCCAACTTGACAGAGATTTGGGCATGTCCCACATAGTACTATAGTTTTGGATAAACTGTGACAGGGTTATACATCAAGGACCATTTTTAATTCTGTTCCTAGAGTCAAAATACCTCTGTTATAAATGCATAATATATACAAACATTGATATATGCTAATCTTAGCTTAGCATGCACACCGACATTTCTCTCTAAACTCTGTTCTCACCTTAGCAAAAAGAGCTCGGC[**A/G**]AAGATACAACCAGCACTCCACATATCCACTGAAGACATATAACTCGAGTGAAGCAGGACCTCCGGAGCCCTGTACCACAGAGTAACAACCTATACCAATACAAACACATTTCATGCTCACTGTCAATCCACATAATACACCATTATAACATGTTTATGAGTGGTCCTTACACAAGGGGTAAGGGCGATATGGTACGTATAGATCCTGGACAGACCAAAATCGGCAATCTTGATCTCCCCTCGACTGCTCACCAGGACATTTTCTGGCTTCAGGTCCCGGTGAATGACAGTGTTAGTGTGAAGAAAGTCAAGTCCACTGAGCAGCTGACGCATAACGTCCTACACAGTGAGAAACTACATATTAGCAATAGTATAGGTGAGTTATGTCAAATGCAATGAAGACAGAAAGACAAAAACCTTGATTGTGTCCCTGGCCAGGCCTTCCTCTGAAGCTTTGCTTAGAAATGTGGACAGATCCTGATCGATACACTCGAAAACCAA

SNP111

>scaffold6014896

AGTAAGTTATGTACTGTAAGTATTAATGTACAGTCAGCTGGTCATTAATGTAAAATAAACCCCAACAGAGTGCTCAGAATCCAGATGCAAAGCGGAGGCGTCTTCAATCATCCTAAAGGGGTTTATTTTCTGATGACCTGCTAACTGTACATTATCCCTTATATAATTTCCTTCACTACTTCATTGCATTGACCAATCAAAATCAAGTATTCCACAGAGCTTTCAAAAAACTTTCAGTATTTCCTCTTATCAAAGCTGGGTTAGACTTCTAAGCACATTAACCCATCAAACAAGATGCTTTTTTGACAAAATCCCCAGATTTAATCTATATCAAATATTACGTTACTACATCTGTTAAGTAAGTGGAAGAAGCAATATGTAAAACCAAACTATTAGTCAAGTAATGAGCAAACAATAAGCTGAACGTGAGCTTTCTTTTGCCTTCTGCCAGCTGCCTGCGATGAAAACACA[**A/T**]CAACGCTCACTCCATCCATTCTCAGCTTTAAAGAGTAATGAGCAACAGAAGGGATGATATTCTTCTTCTCCCAAAGTATCAACTTCGGGGACCAAACGTAAACTTCGCTCGATAATTAATGACACCAGACAAATGGCGGCTGATTGAGAAACTTGCCTTTATTGTCAATCACCATCTGCTCCGTAGCGCCAACGCGACACAACGCTAATTGCCTCGAGTGCGTGTAAGATGCCTTTATTAATTAAAACAGAAAATAAAAATTATTTTAGGAAAGCTTCAAAAGCATTGAGCATCAAACAACTTGGCAGCTGTGTGTGTGTGTAGGGCTGAAATTTAGTGGACTGCGTGGTATTTGGTGAGTCCTCTGAAGGGAGGTACCCATAATGCCCCGAGGCCAACGCAGGCCTTTCAGAATGCTGCGGCTGGCAAGTCTCACCGCGCGCTGGGGACGTCAGCAGAAAGTCGTGTGGCCGTGGTGACTGAGGTGACCGAGGGGACCG

SNP112

>scaffold6001098

ACAGGCGCGAGTGATTCATCAGATACATGTTGAGTGGATGAAAGCTCATTGGAAAATATTCAAAGGCCGGCGGCGTCTGAACGACACAACATGCAGATTGAATCTAAGCGCTGCATCAGCGCATTAATGCATTTTAAAAAAGCCTCATTGGCTCAGCACACTTCATTTTTGTGCACAACATCAAAAAAATTGAATTGTCTAATTGTTAATTTGTGAAAAACACACTTATACCTTCAGACTATTAGAAGTCACCCATCAGATGGCACTTAATGTCTGCAGTACAGTCAGGTTAAGACTCAAAGGAGCCGCACCGATCGCTGCGTGTCTGGAACATTGCATCATGGAACGGTGTTGCCCCGGGGCGCGAGCATTTAAAACACTTCAGTAGATCAATGAGTGATGTGGAAAGATGCTGTAAAGTCATTTGTATGGTAACAGGGTGTTGTGGGCGAGGCGGGTGAAAGAGGACCACCTGGACCGGACGGAAATGAGGTACAGG[**G/C**]TCTCCACCATCGTTACTTTATCACCTGATGGTTATACGAAAGGAATTCCTGAAGACTTAAAAAGTCATTTTTGCATTTCTATTTTTAGGGTCCTGTTGGAGGAACTGGCAGCAGAGGTTTTCCTGGTCTCCGAGTGAGTCCTGCACACATACATGTCTACATATAACTTACAGTAAGATTCTCAACATCAGTGCACAAATAAAAGAGAGAGAGAGAG
